# Supplementary material
Source: PubMed Central journal article supplement (PMC3277544)
Supplement: 1106877109_pnas.201106877SI.pdf [file 1106877109_pnas.201106877SI.pdf]

# Supporting Information

Hvilsom et al. 10.1073/pnas.1106877109

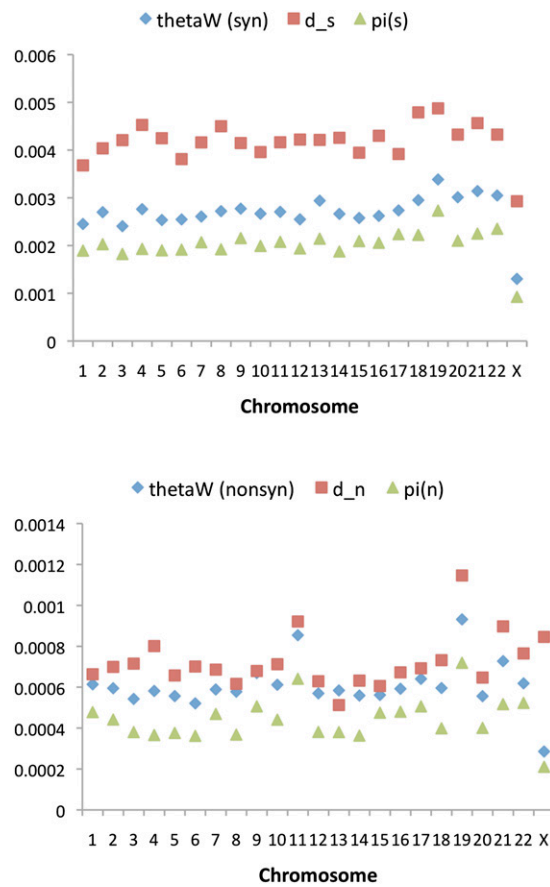

**Fig. S1.** Synonymous and nonsynonymous diversity and divergence per chromosome. Watterson's  $\theta$  for synonymous sites was calculated as the number of synonymous SNPs divided by the number of synonymous sites for each chromosome, and then divided by  $\sum_{i=1}^{23} \frac{1}{i}$  for autosomes and  $\sum_{i=1}^{17} \frac{1}{i}$  for the X chromosome. Synonymous  $\pi$  was calculated as the average synonymous heterozygosity for each chromosome. Synonymous divergence was calculated as the number of fixed synonymous substitutions on the chimp branch divided by the number of synonymous sites. For diversity and divergence the same set of exons was used. Watterson's  $\theta$  is shown in general higher than  $\pi$ , consistent with a growing population scenario. Watterson  $\theta$  and  $\pi$  both increase with chromosome number, and both decrease dramatically on the X chromosome. Synonymous divergence shows a similar pattern, but for nonsynonymous divergence, the X chromosome is not reduced compared with the other chromosomes.





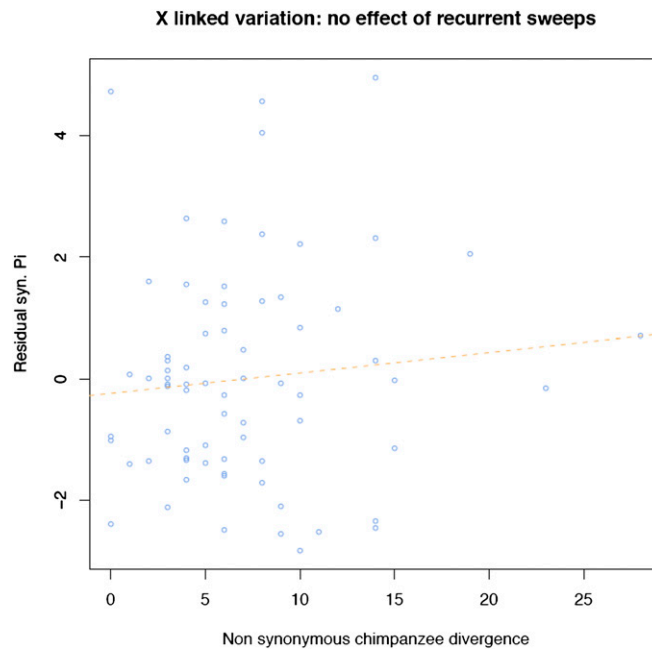

**Fig. 56.** No apparent effect of recurrent selective sweep on synonymous diversity in X-linked regions. Data on chromosome X are divided in 72 windows (blue open circle) comprising each 10 kb of exonic material. Nonsynonymous divergence is measured through the number of nonsynonymous substitutions affecting specifically the chimpanzee branch in each window. A corrected measure of synonymous nucleotide diversity is obtained after accounting for the level of synonymous divergence among windows (a regression model with synonymous divergence explains about 11% of the total variation in synonymous nucleotide diversity). The orange dotted line denotes the regression of corrected (residual) synonymous diversity against nonsynonymous divergence and is not significantly different from zero ( $P$  value  $>0.4$ ).

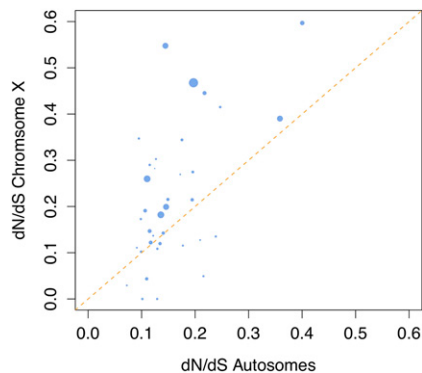

**Fig. 57.** Rates of evolution ( $d_N/d_S$ ) are higher on the X chromosome than on autosomes. Rates of evolution ( $d_N/d_S$ ) in autosomes versus the X chromosome are contrasted for the most abundant Gene Ontology categories of biological processes ( $n = 37$ ). Taken together these 37 GO categories comprise 58 and 60%, respectively, of all autosomal exons and X-linked exons in Dataset S1. For each GO category, data from all pooled exons were used to estimate  $d_N/d_S$  using the Nei–Gojobori method. Each circle denotes the  $d_N/d_S$  estimates for a gene ontology category. The size of each circle is proportional to the abundance of each category (on autosomes). The diagonal (orange line) denotes the expectation under null hypothesis that within each GO category the  $d_N/d_S$  in autosomal versus X linked genes are identical. Of 37 GO categories considered, 27 exhibit higher  $d_N/d_S$  in X-linked genes (paired Wilcoxon rank test,  $P$  value  $<0.007$ ). Accordingly, the predicted  $d_N/d_S$ , based on the relative abundance of GOs on the X for these 37 categories, is 0.155 (CI 95%: 0.147–0.163), whereas the observed  $d_N/d_S$  on the X is 0.211 (95% CI: 0.179–0.242).

**Table S1. Origin of samples**

| ID       | Sex | Origin                |
|----------|-----|-----------------------|
| Aboume   | M   | Gabon                 |
| Amelie   | F   | Gabon, Haut-Ogooué    |
| Ayrton   | M   | Gabon, Moanda         |
| Bakoumba | M   | Gabon                 |
| Benefice | F   | Gabon (CNRS, Makokou) |
| Chiquita | F   | Gabon                 |
| Cindy    | F   | Wild-caught Africa*   |
| Lalala   | F   | Gabon                 |
| Makokou  | F   | Gabon, Ogooué-Ivindo  |
| Masuku   | F   | Gabon, Haut-Ogooué    |
| Noemie   | F   | Equatorial Guinea     |
| Susi     | F   | Wild-caught Africa*   |

The 12 *Pan troglodytes troglodytes* samples are from wild-born unrelated individuals. F, female; M, male.

\*Tested by mtDNA and microsatellites to be of Central African origin.

**Table S2. Sequencing statistics for first six samples**

| Exon capture                                             | ABOUME       | AMELIE       | AYRTON       | BAKOUMBA     | BENEFICE     | CHIQUITA     |
|----------------------------------------------------------|--------------|--------------|--------------|--------------|--------------|--------------|
| Initial bases on target                                  | 37,806,033   | 37,806,033   | 37,806,033   | 37,806,033   | 37,806,033   | 37,806,033   |
| Initial bases near target*                               | 57,200,015   | 57,200,015   | 57,200,015   | 57,200,015   | 57,200,015   | 57,200,015   |
| Initial bases on or near target                          | 95,006,048   | 95,006,048   | 95,006,048   | 95,006,048   | 95,006,048   | 95,006,048   |
| Total uniquely mapped reads                              | 20,566,908   | 20,897,094   | 20,863,152   | 21,477,662   | 23,371,004   | 22,756,168   |
| Total effective yield, Mb                                | 1851.02      | 1880.74      | 1877.68      | 1932.99      | 2103.39      | 2048.06      |
| Average read length, bp                                  | 90.00        | 90.00        | 90.00        | 90.00        | 90.00        | 90.00        |
| Effective sequence on target, Mb                         | 1329.39      | 1277.51      | 1332.36      | 1329.94      | 1434.26      | 1352.83      |
| Effective sequence near target, Mb                       | 219.01       | 290.06       | 241.94       | 280.91       | 336.41       | 316.13       |
| Effective sequence on or near target, Mb                 | 1548.40      | 1567.57      | 1574.30      | 1610.85      | 1770.68      | 1668.96      |
| Fraction of effective bases on target, %                 | 71.8         | 67.9         | 71.0         | 68.8         | 68.2         | 66.1         |
| Fraction of effective bases on or near target, %         | 83.7         | 83.3         | 83.8         | 83.3         | 84.2         | 81.5         |
| <b>Average sequencing depth on target</b>                | <b>35.16</b> | <b>33.79</b> | <b>35.24</b> | <b>35.18</b> | <b>37.94</b> | <b>35.78</b> |
| Average sequencing depth near target                     | 3.83         | 5.07         | 4.23         | 4.91         | 5.88         | 5.53         |
| Mismatch rate in target region, %                        | 0.62         | 0.62         | 0.60         | 0.64         | 0.60         | 0.60         |
| Mismatch rate in all effective sequence, %               | 0.74         | 0.75         | 0.73         | 0.76         | 0.72         | 0.73         |
| Base covered on target                                   | 36,691,325   | 36,665,142   | 36,628,348   | 36,759,294   | 36,696,323   | 36,712,506   |
| <b>Coverage of target region, %</b>                      | <b>97.1</b>  | <b>97.0</b>  | <b>96.9</b>  | <b>97.2</b>  | <b>97.1</b>  | <b>97.1</b>  |
| Base covered near target                                 | 29582614     | 35146064     | 32302856     | 33562545     | 40692616     | 39546192     |
| Coverage of flanking region, %                           | 51.7         | 61.4         | 56.5         | 58.7         | 71.1         | 69.1         |
| Fraction of target covered with at least 20x, %          | 59.0         | 58.5         | 60.4         | 58.4         | 65.0         | 63.2         |
| Fraction of target covered with at least 10x, %          | 78.6         | 78.7         | 79.2         | 78.4         | 81.8         | 81.2         |
| Fraction of target covered with at least 4x, %           | 91.0         | 91.2         | 91.0         | 91.2         | 91.9         | 91.8         |
| Fraction of flanking region covered with at least 20x, % | 4.7          | 6.6          | 5.3          | 6.4          | 7.7          | 7.1          |
| Fraction of flanking region covered with at least 10x, % | 11.6         | 16.0         | 13.2         | 15.1         | 18.9         | 17.8         |
| Fraction of flanking region covered with at least 4x, %  | 24.9         | 32.8         | 28.0         | 30.9         | 38.9         | 37.2         |

\*Flanking region within 200 bp of target regions.

**Table S3. Sequencing statistics for last six samples**

| Exon capture                                             | LALALA       | MAKOKOU      | MASU.K.U     | NOEMIE       | SUSI_11043   | CINDY_11525  |
|----------------------------------------------------------|--------------|--------------|--------------|--------------|--------------|--------------|
| Initial bases on target                                  | 37,806,033   | 37,806,033   | 37,806,033   | 37,806,033   | 37,806,033   | 37,806,033   |
| Initial bases near target*                               | 57,200,015   | 57,200,015   | 57,200,015   | 57,200,015   | 57,200,015   | 57,200,015   |
| Initial bases on or near target                          | 95,006,048   | 95,006,048   | 95,006,048   | 95,006,048   | 95,006,048   | 95,006,048   |
| Total uniquely mapped reads                              | 17,275,141   | 22,450,448   | 20,576,915   | 20,036,672   | 21,436,483   | 26,448,088   |
| Total effective yield, Mb                                | 1554.76      | 2020.54      | 1851.92      | 1803.30      | 1929.28      | 2380.33      |
| Average read length, bp                                  | 90.00        | 90.00        | 90.00        | 90.00        | 90.00        | 90.00        |
| Effective sequence on target, Mb                         | 1070.54      | 1389.72      | 1233.10      | 1237.95      | 1312.52      | 1655.74      |
| Effective sequence near target, Mb                       | 227.31       | 297.94       | 298.78       | 275.42       | 296.20       | 357.00       |
| Effective sequence on or near target, Mb                 | 1297.84      | 1687.66      | 1531.88      | 1513.37      | 1608.72      | 2012.73      |
| Fraction of effective bases on target, %                 | 68.9         | 68.8         | 66.6         | 68.6         | 68.0         | 69.6         |
| Fraction of effective bases on or near target, %         | 83.5         | 83.5         | 82.7         | 83.9         | 83.4         | 84.6         |
| <b>Average sequencing depth on target</b>                | <b>28.32</b> | <b>36.76</b> | <b>32.62</b> | <b>32.74</b> | <b>34.72</b> | <b>43.80</b> |
| Average sequencing depth near target                     | 3.97         | 5.21         | 5.22         | 4.82         | 5.18         | 6.24         |
| Mismatch rate in target region, %                        | 0.60         | 0.59         | 0.62         | 0.59         | 0.60         | 0.70         |
| Mismatch rate in all effective sequence, %               | 0.72         | 0.72         | 0.75         | 0.72         | 0.73         | 0.81         |
| Base covered on target                                   | 36,497,258   | 36,682,710   | 36,701,512   | 36,604,851   | 36,687,496   | 36,460,039   |
| <b>Coverage of target region, %</b>                      | <b>96.5</b>  | <b>97.0</b>  | <b>97.1</b>  | <b>96.8</b>  | <b>97.0</b>  | <b>96.4</b>  |
| Base covered near target                                 | 34,592,251   | 37,139,854   | 36,594,614   | 38,247,253   | 38,809,387   | 32,979,857   |
| Coverage of flanking region, %                           | 60.5         | 64.9         | 64.0         | 66.9         | 67.8         | 57.7         |
| Fraction of target covered with at least 20x, %          | 53.5         | 63.5         | 57.6         | 60.0         | 61.9         | 67.7         |
| Fraction of target covered with at least 10x, %          | 75.7         | 81.1         | 78.4         | 79.2         | 80.6         | 81.8         |
| Fraction of target covered with at least 4x, %           | 89.7         | 91.7         | 91.2         | 91.0         | 91.6         | 91.0         |
| Fraction of flanking region covered with at least 20x, % | 4.2          | 6.8          | 6.7          | 5.7          | 6.4          | 9.6          |
| Fraction of flanking region covered with at least 10x, % | 12.4         | 16.6         | 16.6         | 15.4         | 16.5         | 19.8         |
| Fraction of flanking region covered with at least 4x, %  | 29.1         | 34.4         | 34.6         | 34.1         | 35.4         | 34.7         |

\*Flanking region within 200 bp of target regions.

**Table S4. Differences between using the hg18 and pantro2 for mapping of reads and identification of SNPs and the potential consequences of using either for the calculation of  $\pi_N/\pi_S$**

|                                                                       | Autosome | X chromosome |
|-----------------------------------------------------------------------|----------|--------------|
| Exon not present in PanTro2 assembly*                                 | 1374     | 87           |
| Synonymous (S) SNPs not polymorphic against panTro2 <sup>†</sup>      | 1029     | 23           |
| Nonsynonymous (NS) SNPs not polymorphic against panTro2 <sup>†</sup>  | 1439     | 21           |
| NS/S SNPs including not polymorphic against panTro2 SNPs <sup>‡</sup> | 0.803    | 0.764        |
| NS/S SNPs excluding not polymorphic against panTro2 SNPs <sup>‡</sup> | 0.784    | 0.759        |

\*Number of SNPs where the corresponding exon is absent from the panTro2 assembly.

<sup>†</sup>Number of SNPs called against hg18, which show no polymorphism when mapped against pantro2.

<sup>‡</sup>Consequences on the nonsynonymous to synonymous ratio of SNPs when keeping or leaving out these SNPs.







Table S7. Number of synonymous SNPs per individual

|                   | ABOUME | AYRTON | BAKOUMBA | AMELIE | BENEFICE | CHIQUITA | LALALA | MAKOKOU | MASU.K.U | NOEMIE | CINDY_11525 | SUSI_11043 | Synonymous length |
|-------------------|--------|--------|----------|--------|----------|----------|--------|---------|----------|--------|-------------|------------|-------------------|
| Chr1              | 660    | 759    | 784      | 774    | 771      | 806      | 701    | 784     | 780      | 746    | 665         | 755        | 395,421.08        |
| Chr2              | 508    | 438    | 439      | 501    | 506      | 497      | 489    | 502     | 512      | 455    | 502         | 446        | 238,286.39        |
| Chr3              | 399    | 359    | 389      | 373    | 406      | 386      | 374    | 382     | 359      | 391    | 383         | 380        | 209,358.1         |
| Chr4              | 269    | 292    | 278      | 209    | 284      | 287      | 265    | 288     | 249      | 269    | 288         | 278        | 139,815.69        |
| Chr5              | 333    | 320    | 338      | 340    | 287      | 334      | 306    | 343     | 346      | 342    | 263         | 332        | 170,423.12        |
| Chr6              | 332    | 316    | 349      | 328    | 353      | 373      | 354    | 361     | 362      | 306    | 298         | 337        | 177,131.11        |
| Chr7              | 314    | 317    | 306      | 290    | 319      | 328      | 300    | 321     | 345      | 296    | 309         | 293        | 150,446.97        |
| Chr8              | 178    | 218    | 211      | 200    | 206      | 197      | 200    | 206     | 184      | 202    | 192         | 214        | 104,437.96        |
| Chr9              | 311    | 321    | 329      | 322    | 309      | 324      | 311    | 303     | 299      | 333    | 287         | 297        | 144,877.49        |
| Chr10             | 269    | 295    | 321      | 313    | 296      | 306      | 284    | 327     | 284      | 297    | 268         | 290        | 148,537.78        |
| Chr11             | 452    | 382    | 438      | 458    | 412      | 396      | 437    | 453     | 439      | 414    | 419         | 402        | 204,590.04        |
| Chr12             | 393    | 390    | 327      | 322    | 300      | 360      | 336    | 365     | 393      | 366    | 365         | 378        | 184,564.16        |
| Chr13             | 138    | 126    | 162      | 151    | 135      | 151      | 149    | 158     | 157      | 122    | 153         | 132        | 67,398.64         |
| Chr14             | 215    | 189    | 201      | 224    | 209      | 232      | 206    | 200     | 202      | 209    | 166         | 199        | 108,993.4         |
| Chr15             | 242    | 243    | 253      | 278    | 272      | 245      | 227    | 260     | 283      | 243    | 206         | 248        | 119,387.06        |
| Chr16             | 273    | 263    | 278      | 281    | 251      | 279      | 260    | 294     | 283      | 274    | 232         | 258        | 130,710.41        |
| Chr17             | 439    | 417    | 437      | 418    | 457      | 456      | 417    | 382     | 448      | 387    | 437         | 435        | 191,001.04        |
| Chr18             | 132    | 120    | 127      | 115    | 142      | 128      | 145    | 129     | 125      | 138    | 150         | 125        | 59,074.58         |
| Chr19             | 467    | 506    | 456      | 445    | 458      | 444      | 433    | 460     | 481      | 457    | 388         | 463        | 166,396.01        |
| Chr20             | 176    | 166    | 204      | 162    | 164      | 193      | 153    | 180     | 190      | 157    | 176         | 165        | 82,775.73         |
| Chr21             | 90     | 91     | 86       | 65     | 81       | 84       | 93     | 72      | 48       | 83     | 83          | 70         | 35,043.04         |
| Chr22             | 128    | 134    | 117      | 144    | 130      | 146      | 122    | 135     | 152      | 145    | 140         | 165        | 58,744.85         |
| ChrX              | 0      | 0      | 0        | 89     | 118      | 114      | 78     | 105     | 104      | 106    | 121         | 107        | 113,291.48        |
| Autosomal average | 6,718  | 6,662  | 6,830    | 6,713  | 6,748    | 6,952    | 6,562  | 6,905   | 6,921    | 6,632  | 6,351       | 6,662      | 3,287,414.65      |

**Table S8. Number of synonymous ( $\pi_S$ ) and nonsynonymous ( $\pi_N$ ) SNPs in central chimps and the number of synonymous ( $d_S$ ) and nonsynonymous ( $d_N$ ) changes on the chimpanzee branch, estimated from human–chimp divergence using orangutan as an outgroup for assigning events to branches**

| Chromosome | $d_N$ | $d_S$ | $d_N/d_S$ | $\pi_N$ | $\pi_S$ | $\pi_N/\pi_S$ | NI    | Nonsyn sites | Syn sites  |
|------------|-------|-------|-----------|---------|---------|---------------|-------|--------------|------------|
| 1          | 899   | 1,455 | 0.618     | 3,108   | 3,620   | 0.859         | 1.390 | 1,355,702.92 | 395,421.08 |
| 2          | 587   | 962   | 0.610     | 1,865   | 2,402   | 0.776         | 1.272 | 839,811.61   | 238,286.39 |
| 3          | 521   | 881   | 0.591     | 1,476   | 1,881   | 0.785         | 1.327 | 728,525.9    | 209,358.1  |
| 4          | 402   | 633   | 0.635     | 1,090   | 1,442   | 0.756         | 1.190 | 501,899.31   | 139,815.69 |
| 5          | 389   | 724   | 0.537     | 1,230   | 1,613   | 0.763         | 1.419 | 591,837.88   | 170,423.12 |
| 6          | 435   | 675   | 0.644     | 1,207   | 1,685   | 0.716         | 1.112 | 620,628.89   | 177,131.11 |
| 7          | 357   | 626   | 0.570     | 1,145   | 1,465   | 0.782         | 1.370 | 520,704.03   | 150,446.97 |
| 8          | 227   | 470   | 0.483     | 795     | 1,061   | 0.749         | 1.551 | 368,341.04   | 104,437.96 |
| 9          | 340   | 601   | 0.566     | 1,251   | 1,500   | 0.834         | 1.474 | 500,575.51   | 144,877.49 |
| 10         | 371   | 588   | 0.631     | 1,190   | 1,480   | 0.804         | 1.274 | 520,981.22   | 148,537.78 |
| 11         | 643   | 852   | 0.755     | 2,227   | 2,067   | 1.077         | 1.428 | 698,178.96   | 204,590.04 |
| 12         | 401   | 779   | 0.515     | 1,356   | 1,757   | 0.772         | 1.499 | 637,426.84   | 184,564.16 |
| 13         | 122   | 284   | 0.430     | 519     | 740     | 0.701         | 1.633 | 237,950.36   | 67,398.64  |
| 14         | 240   | 464   | 0.517     | 793     | 1,084   | 0.732         | 1.414 | 379,736.6    | 108,993.4  |
| 15         | 250   | 471   | 0.531     | 866     | 1,149   | 0.754         | 1.420 | 412,794.94   | 119,387.06 |
| 16         | 294   | 562   | 0.523     | 967     | 1,279   | 0.756         | 1.445 | 437,246.59   | 130,710.41 |
| 17         | 448   | 748   | 0.599     | 1548    | 1,952   | 0.793         | 1.324 | 647,024.96   | 191,001.04 |
| 18         | 152   | 283   | 0.537     | 462     | 651     | 0.710         | 1.321 | 207,649.42   | 59,074.58  |
| 19         | 659   | 811   | 0.813     | 2,000   | 2,103   | 0.951         | 1.170 | 574,978.99   | 166,396.01 |
| 20         | 182   | 358   | 0.508     | 584     | 931     | 0.627         | 1.234 | 281,241.27   | 82,775.73  |
| 21         | 109   | 160   | 0.681     | 330     | 411     | 0.803         | 1.179 | 121,469.96   | 35,043.04  |
| 22         | 150   | 254   | 0.591     | 453     | 669     | 0.677         | 1.147 | 196,078.15   | 58,744.85  |
| X          | 508   | 505   | 1.006     | 617     | 808     | 0.764         | 0.759 | 600,624.31   | 172,475.69 |

The total number of syn and nonsyn sites are also shown.

## Other Supporting Information Files

[Dataset S1 \(RTF\)](#)
